# Supplementary material for: Synthesis of long hierarchical MoS2nanofibers assembled from nanosheets with an expanded interlayer distance for achieving superb Na-ion storage performance
Source: Royal Society of Chemistry journal article supplement (doi:10.1039/c7nr06021a), 2017-01-01
Supplement: c7nr06021a1.pdf [file c7nr06021a1.pdf]

## Supporting Information

Synthesis of long hierarchical MoS<sub>2</sub> nanofibers assembled from nanosheets with expanded interlayer distance for achieving superb Na-ion storage performance

Zhonggui Gao,<sup>a</sup> Xiao Yu,<sup>b</sup> Jiang Zhao,<sup>b</sup> Wenxia Zhao,<sup>c</sup> Ruimei Xu,<sup>c</sup> Yong Liu,<sup>\*b</sup> and Hui Shen<sup>a</sup>

<sup>a</sup>Institute for Solar Energy Systems, School of Physics, Sun Yat-sen University, Guangzhou 510275, China

<sup>b</sup>School of Materials Science and Engineering, State Key Laboratory of Optoelectronic Materials and Technologies, Sun Yat-sen University, Guangzhou 510275, China.

<sup>c</sup>Instrumental Analysis & Research Center, Sun Yat-sen University, Guangzhou 510275, China

\*Corresponding author. Tel: +86 020 39332861; fax: +86 020 39332866. *E-mail*

*address:* [liuyong7@mail.sysu.edu.cn](mailto:liuyong7@mail.sysu.edu.cn) (Y. Liu)

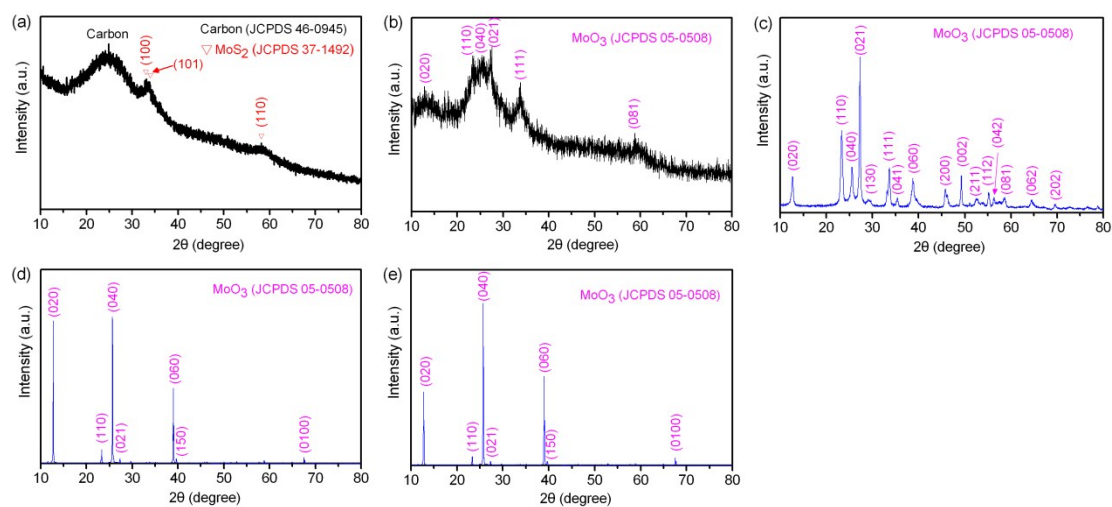

**Fig. S1** XRD patterns of hydrothermal obtained hierarchical MoS<sub>2</sub> nanofibers after heat treatment at different interrupting temperature in air atmosphere. (a) 282 °C, (b) 374 °C, (c) 437 °C, (d) 789 °C and (e) 800 °C.

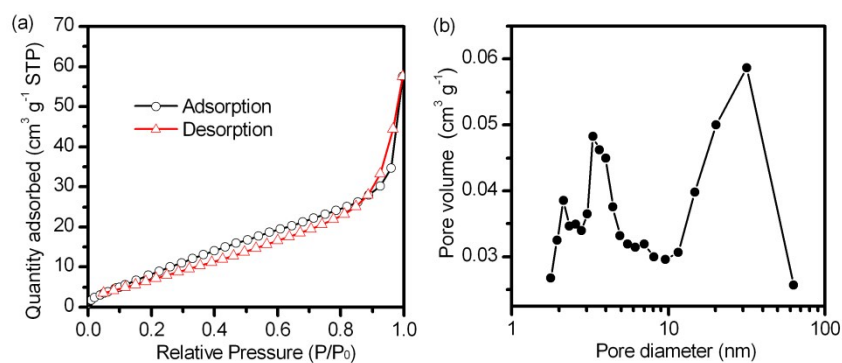

**Fig.S2** (a) Nitrogen adsorption-desorption isotherms and (b) corresponding pore size distribution of hierarchical MoS<sub>2</sub> nanofibers.

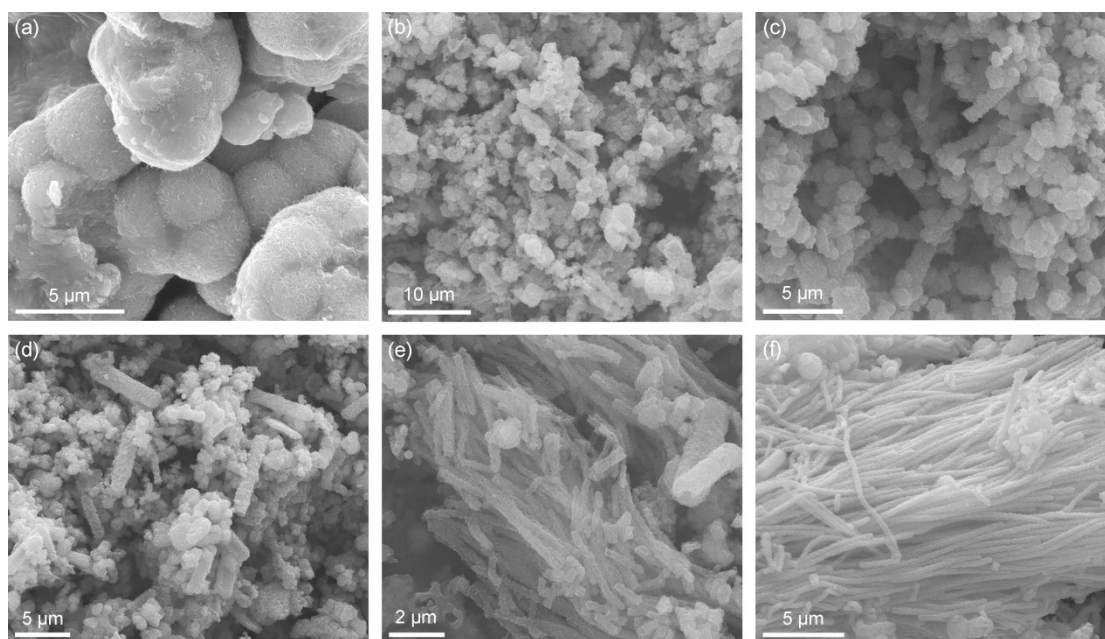

**Fig.S3** FESEM images of the  $\text{MoS}_2$  products synthesized (a) without addition of PVP and using 0.1 g of PVP with varying MWs: (b)  $\text{PVP}_{\text{MW}} = 8,000$ , (c)  $\text{PVP}_{\text{MW}=10,000}$ , (d)  $\text{PVP}_{\text{MW}=24,000}$ , (e)  $\text{PVP}_{\text{MW}=58,000}$ , and (f)  $\text{PVP}_{\text{MW}=1,300,000}$ .

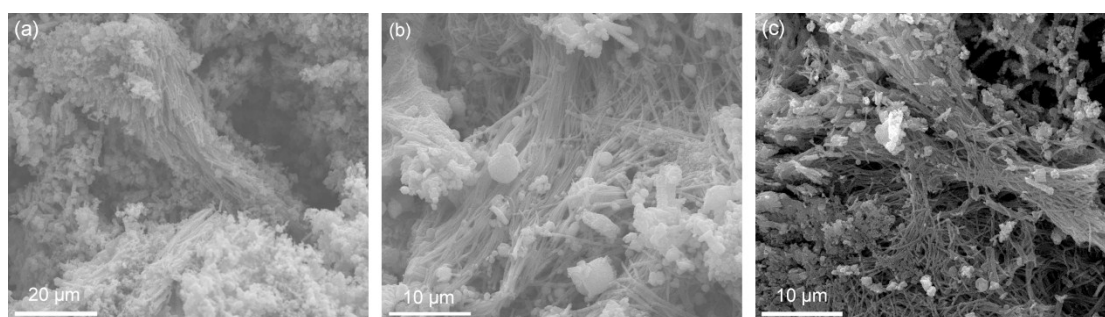

**Fig.S4** FESEM images of the  $\text{MoS}_2$  products obtained by varying the additive amount of  $\text{PVP}_{\text{MW}=1,300,000}$ : (a) 0.02 g, (b) 0.05 g, and 0.075 g.

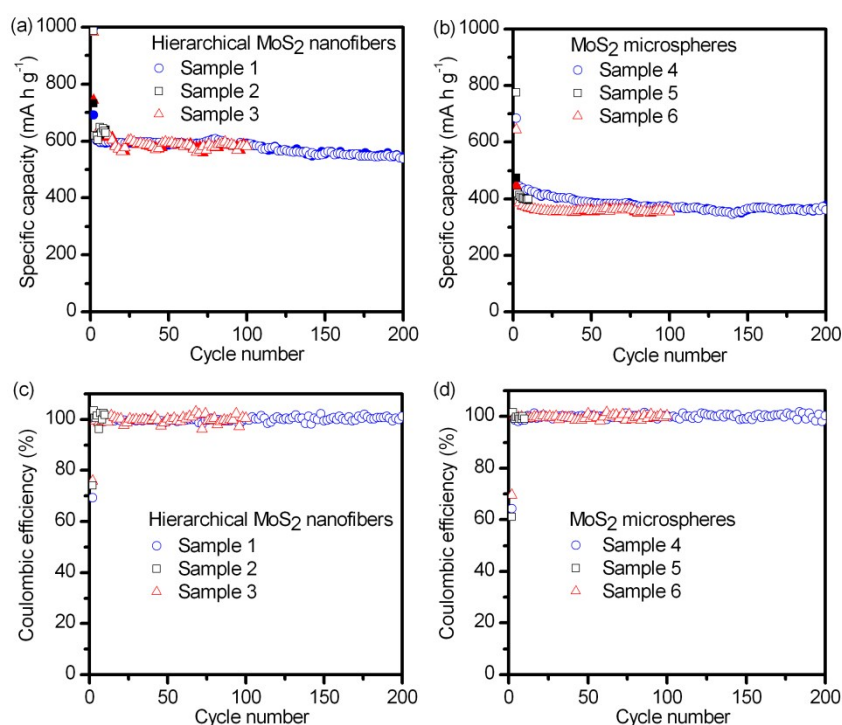

**Fig.S5** (a) and (b) Cycling performance and (c) and (d) Coulombic efficiency of the hierarchical MoS<sub>2</sub> nanofiber electrodes and MoS<sub>2</sub> microsphere electrodes obtained at current density of 0.1 A g<sup>-1</sup> showing repeatable results. Data in Sample 1 (hierarchical MoS<sub>2</sub> nanofibers) and Sample 4 (MoS<sub>2</sub> microspheres) come from Fig.5a; Data in Sample 2 (hierarchical MoS<sub>2</sub> nanofibers) and Sample 5 (MoS<sub>2</sub> microspheres) come from Fig.5e; Data in Sample 3 (hierarchical MoS<sub>2</sub> nanofibers) and Sample 6 (MoS<sub>2</sub> microspheres) come from a new set of testing results.

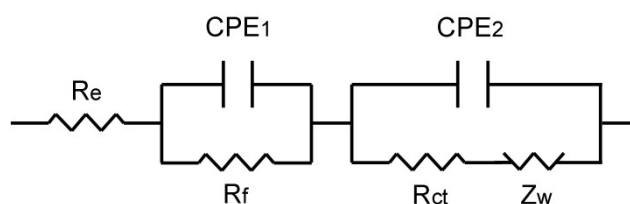

**Fig. S6** The used equivalent circuit model. In this model,  $R_e$  represents the internal resistance of cells, and  $R_f$  and  $CPE_1$  are associated with the resistance and constant phase element of SEI film, respectively.  $R_{ct}$  and  $CPE_2$  depict the charge transfer resistance and constant phase element of the electrode/electrolyte interface, respectively. Meanwhile,  $Z_w$  is the Warburg impedance.
